# Supplementary material for: Metal–organic framework-derived Ni-based catalyst for the hydrotreatment of triolein into green diesel
Source: Royal Society of Chemistry journal article supplement (doi:10.1039/d1se00104c), 2021-01-01
Supplement: d1se00104c1.pdf [file d1se00104c1.pdf]

# Metal-Organic Frameworks Derived Ni-Based Catalyst for Hydrotreatment of Triolein into Green Diesel

Peng Liu <sup>ac†</sup>, Changzhou Chen <sup>ac†</sup>, Minghao Zhou <sup>b\*</sup>, Junming Xu <sup>a</sup>, Haihong,  
Xia <sup>a</sup>, Shibin Shang <sup>a\*</sup>, Jianchun Jiang <sup>ac\*</sup>

- a. Institute of Chemical Industry of Forest Products, Chinese Academy of Forestry; Key Lab. of Biomass Energy and Material, Jiangsu Province; National Engineering Lab. for Biomass Chemical Utilization; Key and Open Lab. on Forest Chemical Engineering, SFA, Nanjing 210042, China*
- b. School of Chemistry and Chemical Engineering, Yangzhou University, Yangzhou 225002, China*
- c. Co-Innovation Center of Efficient Processing and Utilization of Forest Resources, Nanjing Forestry University, Nanjing 210037, China*

\* Corresponding Author: E-mail: [zhouminghao@yzu.edu.cn](mailto:zhouminghao@yzu.edu.cn) (Minghao Zhou)

[shangsb@163.com](mailto:shangsb@163.com) (Shibin Shang)

[jiangjc@icifp.cn](mailto:jiangjc@icifp.cn) (Jianchun Jiang)

†These authors contributed equally: Peng Liu and Changzhou Chen

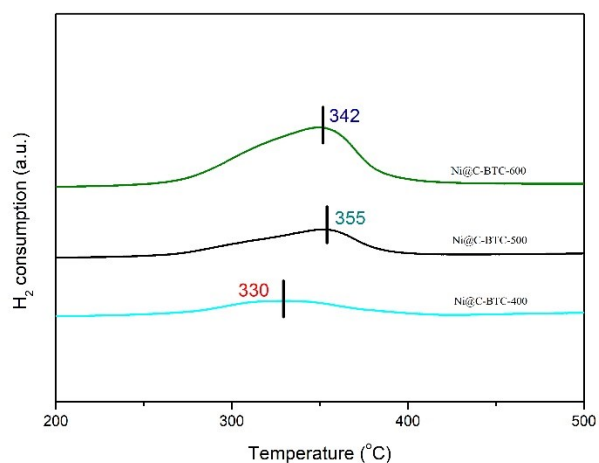

Fig. S1 H<sub>2</sub> chemisorption of Ni@C-BTC-400, Ni@C-BTC-500 and Ni@C-BTC-600 catalyst.

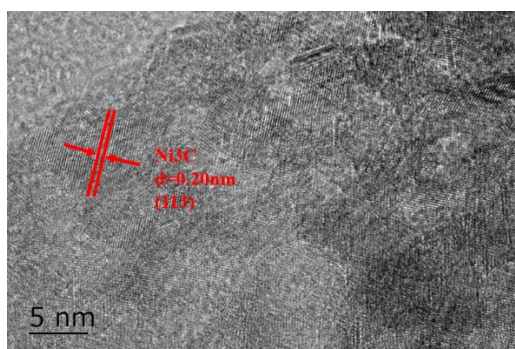

Fig. S2 HRTEM image of Ni@C-BTC-400

**Table S1.** Optimization for the hydrotreatment of triolein.<sup>a</sup>

| Entry | Cat.         | Main product distribution/% <sup>b</sup> |      |       |      | Conversion/% <sup>b</sup> | Cracking ratio/% | DCO/HDO |
|-------|--------------|------------------------------------------|------|-------|------|---------------------------|------------------|---------|
|       |              | C15                                      | C16  | C17   | C18  |                           |                  |         |
| 1     | Ni@C-BTC-400 | 0.81                                     | 1.95 | 80.50 | 0.54 | 98.88                     | 4.61             | 13.22   |
| 2     | Ni@C-400     | 3.30                                     | 3.20 | 52.14 | 0.88 | 58.38                     | 25.6             | 13.58   |

<sup>a</sup> Reaction conditions: Triolein (2.0 g), catalyst (0.4 g) and cyclohexanol (20 g), 3.0 MPa H<sub>2</sub>, 4 h
